# Supplementary material for: Plasma levels of soluble VEGF receptor isoforms, circulating pterins and VEGF system SNPs as prognostic biomarkers in patients with acute coronary syndromes
Source: Springer Nature journal article supplement (doi:10.1186/s12872-018-0894-1), 2018-08-15
Supplement: MOESM1 [file 16039528]

### Supplementary Table 1.

Baseline characteristics of the CDCS cohort stratified on whether they were assayed for sFlt-1 or not.

| <b>Baseline characteristics</b>                        | <b>n</b>                  | <b>Mean ± SE or n (%)</b>                                                      | <b>n</b>                      | <b>Mean ± SE or n (%)</b>                                                          | <b>p-value</b> |
|--------------------------------------------------------|---------------------------|--------------------------------------------------------------------------------|-------------------------------|------------------------------------------------------------------------------------|----------------|
|                                                        | <b>Assayed for sFlt-1</b> |                                                                                | <b>Not assayed for sFlt-1</b> |                                                                                    |                |
| Male Gender                                            | 513                       | 362 (70.6)                                                                     | 1554                          | 1121 (72.1)                                                                        | 0.660          |
| Age at baseline (years)                                | 513                       | 68.8 ± 0.53                                                                    | 1554                          | 65.8±0.31                                                                          | <0.001         |
| Ethnicity (European, Maori & Pasifika, Other, Unknown) | 513                       | Euro 447(87.1)<br>Maori/Pasifika 26(5.0)<br>Other 24 (4.6)<br>Unknown 16 (3.2) | 1554                          | Euro 1340 (86.2)<br>Maori/Pasifika 76 (4.8)<br>Other 38 (2.4)<br>Unknown 100 (7.3) | 0.493          |
| <b>Discharge Medications</b>                           |                           |                                                                                |                               |                                                                                    |                |
| ACE inhibitor                                          | 513                       | 301 (58.6)                                                                     | 1554                          | 878 (56.5)                                                                         | 0.389          |
| β-blocker                                              | 513                       | 443 (86.3)                                                                     | 1554                          | 1335 (85.9)                                                                        | 0.843          |
| Diuretic                                               | 513                       | 142 (27.6)                                                                     | 1554                          | 424 (27.3)                                                                         | 0.888          |
| Statin                                                 | 513                       | 451 (87.9)                                                                     | 1554                          | 1375 (88.5)                                                                        | 0.689          |

## Supplementary Table 2.

Genetic associations with VEGFR levels in baseline plasma and angiogram measurements from a) patients of European ethnic group and b) non-European ethnic group.

### a) European ethnic group n=1747

#### i) *VEGFR2* - rs1870377

|                 | n    | TT           | n   | TA            | n   | AA           | <i>p</i> |
|-----------------|------|--------------|-----|---------------|-----|--------------|----------|
| Age (years)     | 1000 | 67.5±0.38    | 643 | 68.3±0.46     | 104 | 67.9±1.02    | 0.395    |
| Male Gender     | 1000 | 721 (72.1%)  | 643 | 449 (69.8%)   | 104 | 80 (76.9%)   | 0.278    |
| sFlt-1 (pg/ml)* | 264  | 107(101-114) | 172 | 104(98.2-111) | 25  | 129(103-161) | 0.046    |
| sKDR (pg/ml)    | 116  | 11100±236    | 71  | 10700±331     | 14  | 9350±470     | 0.041    |
| Brandt Score    | 528  | 3.30±0.13    | 332 | 3.36±0.18     | 56  | 4.14±0.50    | 0.248    |

#### ii) *VEGFR1* - rs748252

|                  | n   | CC           | n   | CT            | n   | TT            | <i>p</i> |
|------------------|-----|--------------|-----|---------------|-----|---------------|----------|
| Age (years)      | 710 | 67.9±0.44    | 790 | 67.9±0.43     | 235 | 67.5±0.80     | 0.912    |
| Male Gender      | 710 | 520 (73.2%)  | 790 | 556 (70.4%)   | 235 | 164 (69.8%)   | 0.391    |
| sFlt-1 (pg/ml) * | 215 | 110(104-118) | 201 | 104(97.9-110) | 44  | 108(91.4-128) | 0.293    |
| sKDR (pg/ml)     | 99  | 11100±282    | 84  | 10700±257     | 18  | 10400±634     | 0.285    |
| Brandt Score     | 389 | 3.21±0.15    | 404 | 3.41±0.16     | 119 | 3.72±0.32     | 0.065    |

### b) non-European ethnic group n=264

#### i) *VEGFR2* - rs1870377

|                 | n   | TT             | n   | TA             | n  | AA             | <i>p</i> |
|-----------------|-----|----------------|-----|----------------|----|----------------|----------|
| Age (years)     | 133 | 58.7±1.09      | 103 | 59.1±1.10      | 32 | 61.4±1.95      | 0.515    |
| Male Gender     | 133 | 98 (73.7%)     | 103 | 72(69.9%)      | 32 | 26 (81.3%)     | 0.440    |
| sFlt-1 (pg/ml)* | 20  | 89.5(76.3-105) | 16  | 98.4(80.0-121) | 2  | 152(8.36-2760) | 0.207    |
| sKDR (pg/ml)    | 5   | 9410±934       | 4   | 11800±1360     | 1  | 7930           | 0.531    |
| Brandt Score    | 50  | 2.97±0.48      | 45  | 3.60±0.48      | 13 | 2.77±0.92      | 0.507    |

ii) **VEGFR1 - rs748252**

|                 | n  | CC            | n   | CT             | n  | TT             | <i>p</i> |
|-----------------|----|---------------|-----|----------------|----|----------------|----------|
| Age (years)     | 91 | 59.3±1.36     | 131 | 59.1±0.99      | 42 | 58.5±1.74      | 0.929    |
| Male Gender     | 91 | 70 (76.9%)    | 131 | 94 (71.8%)     | 42 | 29 (69.0%)     | 0.563    |
| sFlt-1 (pg/ml)* | 9  | 108(74.5-156) | 23  | 93.9(80.3-110) | 6  | 86.7(70.7-106) | 0.563    |
| sKDR (pg/ml)    | 2  | 9400±1130     | 6   | 10700±1260     | 2  | 9510±1400      | 0.924    |
| Brandt Score    | 38 | 2.90±0.55     | 53  | 2.95±0.40      | 16 | 4.91±1.00      | 0.083    |

\*geometric mean

### Supplementary Table 3.

Baseline characteristics of the CDCS cohort stratified on whether they were assayed for neopterin or not.

| <b>Baseline characteristics</b>                        | <b>n</b>                     | <b>Mean ± SE or n (%)</b>                                                   | <b>n</b>                         | <b>Mean ± SE or n (%)</b>                                                          | <b>p-value</b> |
|--------------------------------------------------------|------------------------------|-----------------------------------------------------------------------------|----------------------------------|------------------------------------------------------------------------------------|----------------|
|                                                        | <b>Assayed for neopterin</b> |                                                                             | <b>Not assayed for neopterin</b> |                                                                                    |                |
| Male Gender                                            | 142                          | 97 (68.3)                                                                   | 1925                             | 1382 (71.8)                                                                        | 0.377          |
| Age at baseline (years)                                | 142                          | 66.9 ± 1.00                                                                 | 1925                             | 66.46±0.28                                                                         | 0.667          |
| Ethnicity (European, Maori & Pasifika, Other, Unknown) | 142                          | Euro 133(93.6)<br>Maori/Pasifika 6 (4.3)<br>Other 1 (0.7)<br>Unknown 2(1.4) | 1925                             | Euro 1657 (86.1)<br>Maori/Pasifika 127 (6.8)<br>Other 77 (4.0)<br>Unknown 66 (3.3) | 0.070          |
| <b>Discharge Medications</b>                           |                              |                                                                             |                                  |                                                                                    |                |
| ACE inhibitor                                          | 142                          | 83 (58.5)                                                                   | 1925                             | 1103 (57.3)                                                                        | 0.781          |
| β-blocker                                              | 142                          | 126 (88.7)                                                                  | 1925                             | 1648 (85.6)                                                                        | 0.306          |
| Diuretic                                               | 142                          | 44 (31.0)                                                                   | 1925                             | 522 (27.1)                                                                         | 0.313          |
| Statin                                                 | 142                          | 126 (88.7)                                                                  | 1925                             | 1700 (88.3)                                                                        | 0.874          |
