# Supplementary material for: Plasma levels of soluble VEGF receptor isoforms, circulating pterins and VEGF system SNPs as prognostic biomarkers in patients with acute coronary syndromes
Source: Springer Nature journal article supplement (doi:10.1186/s12872-018-0894-1), 2018-08-15
Supplement: MOESM2 [file 16039528]

Supplementary Figure 1.

Receiver-operator curve analysis of NT-proBNP and sFlt-1 as predictors of mortality at 5 years of follow-up in the CDCS cohort.

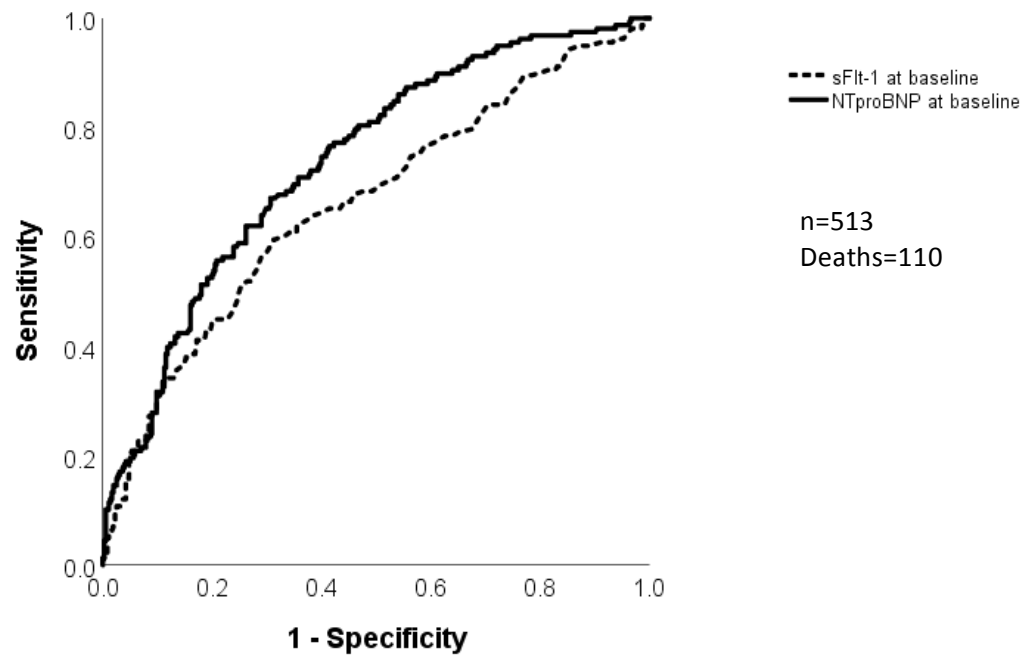

| Analyte              | AUC   | 95% CI for AUC | p-value |
|----------------------|-------|----------------|---------|
| sFlt-1 at baseline   | 0.633 | 0.571-0.695    | <0.001  |
| NTproBNP at baseline | 0.767 | 0.719-0.815    | <0.001  |
